# Supplementary material
Source: Springer Nature journal article supplement (https://www.springermedizin.de/resource/supplementary/12880_2012_167_MOESM2_ESM.pdf/9450158)

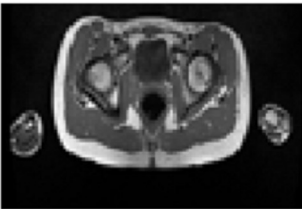

a) Axial  
MRI

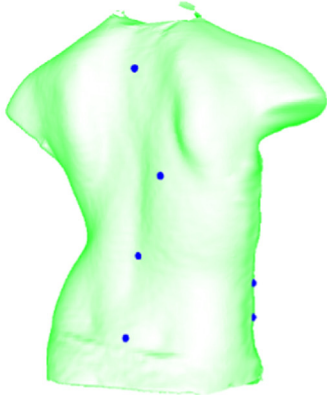

b) TP

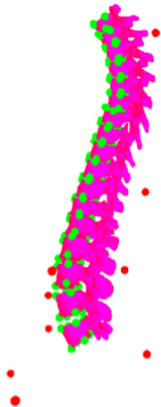

c) X-ray

Supplement: MOESM2 [file 9450158]
